# Supplementary material
Source: publisher figshare collection journal article supplement (https://sage.figshare.com/ndownloader/files/17484752)
Supplement: Supplementary file 1 [file 17484752]

**Supplementary Table 3.** Summary of clinical details derived from cases with primary vasculitis of the oral cavity, skin, muscle, or multiple organs.

| Case | System affected             | Age         | Sex | Breed                | Clinical signs                                                                                                                 | Laboratory tests                                                                                                                                         | Imaging findings                                                                                    | Pathological description                                                                                                | Outcome                                          |
|------|-----------------------------|-------------|-----|----------------------|--------------------------------------------------------------------------------------------------------------------------------|----------------------------------------------------------------------------------------------------------------------------------------------------------|-----------------------------------------------------------------------------------------------------|-------------------------------------------------------------------------------------------------------------------------|--------------------------------------------------|
| 7    | Oral cavity                 | 4 yr, 10 mo | FI  | Jack Russell Terrier | Oral ulceration of 3 months' duration; interdigital dermatitis; pyrexia (rectal temperature 39.7°C).                           | Hematology: mild neutrophilia. Fine-needle aspirates from mandibular lymph nodes: neutrophilic lymphadenitis.                                            |                                                                                                     | Ulcerative stomatitis with fibrinocellular crust; infiltration of reactive stromal vessels by neutrophils.              | Discharged from hospital, lost to follow-up.     |
| 8    | Oral cavity                 | 10 yr       | FS  | Rhodesian Ridgeback  | Halitosis; extensive necrotic ulceration of the oral cavity; superficial wound on the metatarsal pad of the right pelvic limb. | Hematology, biochemistry, and urinalysis: unremarkable. Popliteal lymph node aspirates: reactive hyperplasia. Serum antinuclear antibody titer negative. | Abdominal US: fluid-filled mass caudal to the bladder. Thoracic radiographs unremarkable.           | Fibrinosuppurative inflammation of tongue and buccal mucosa, with multifocal fibrinoid change and epidermal ulceration. | Discharged from the hospital, lost to follow-up. |
| 9    | Systemic                    | 6 yr        | FI  | Maltese              | Lethargy; exercise intolerance; bilateral ocular discharge; sneezing; lymphadenopathy; vaginal discharge.                      | Hematology unremarkable. Biochemistry: increased total bilirubin, ALT and ALP activity, reduced albumin, increased cholesterol. Proteinuria (UPC 2.03).  | Abdominal US: increased renal echogenicity, fluid-filled uterus. Thoracic radiographs unremarkable. | Liver biopsy; uterine biopsy; biopsy of mammary nodule: necrotizing arteritis and vasculitis.                           | Euthanized after 410 days.                       |
| 10   | Non-healing cutaneous wound | 8 yr        | MN  | Labrador Retriever   | Chronic non-healing wound on right flank.                                                                                      | Hematology: mild non-regenerative anemia, neutrophilia. Biochemistry: mild hypoalbuminemia. Bacterial culture: methicillin-resistant                     | NA.                                                                                                 | Thrombosis and necrotic dermatitis with suspected primary vasculitis.                                                   | Alive at time of follow-up (930 days).           |

|    |                 |      |    |               |                                                                                                                   |                                                                                                                     |                                           |                                                          |                                        |
|----|-----------------|------|----|---------------|-------------------------------------------------------------------------------------------------------------------|---------------------------------------------------------------------------------------------------------------------|-------------------------------------------|----------------------------------------------------------|----------------------------------------|
|    |                 |      |    |               |                                                                                                                   | <i>Staphylococcus aureus.</i>                                                                                       |                                           |                                                          |                                        |
| 11 | Cervical muscle | 5 yr | FS | Border Collie | Lethargy; inappetence; neck pain; obtundation; head tilt to left side; tetraparesis; mild cervical hyperesthesia. | Hematology: mild neutrophilia, non-regenerative anemia. Biochemistry: mild hypoalbuminemia, increased ALP activity. | MRI of neck: myositis in region of C3-C4. | Chronic mixed panniculitis with myositis and vasculitis. | Alive at time of follow-up (946 days). |

\* FI = female, intact; FS = female, spayed; MN = male, neutered; US = ultrasound; UPC = urine protein-to-creatinine ratio; ALT = alanine aminotransferase; ALP = alkaline phosphatase; MRI = magnetic resonance imaging; PCR = polymerase chain reaction.
